# Supplementary material for: Flavonones from Penthorum chinense Ameliorate Hepatic Steatosis by Activating the SIRT1/AMPK Pathway in HepG2 Cells
Source: Int J Mol Sci. 2018 Aug 28;19(9):2555. doi: 10.3390/ijms19092555 (PMC6165420; doi:10.3390/ijms19092555)
Supplement: Supplementary file 1 [file ijms-19-02555-s001.pdf]

## Supplementary Materials

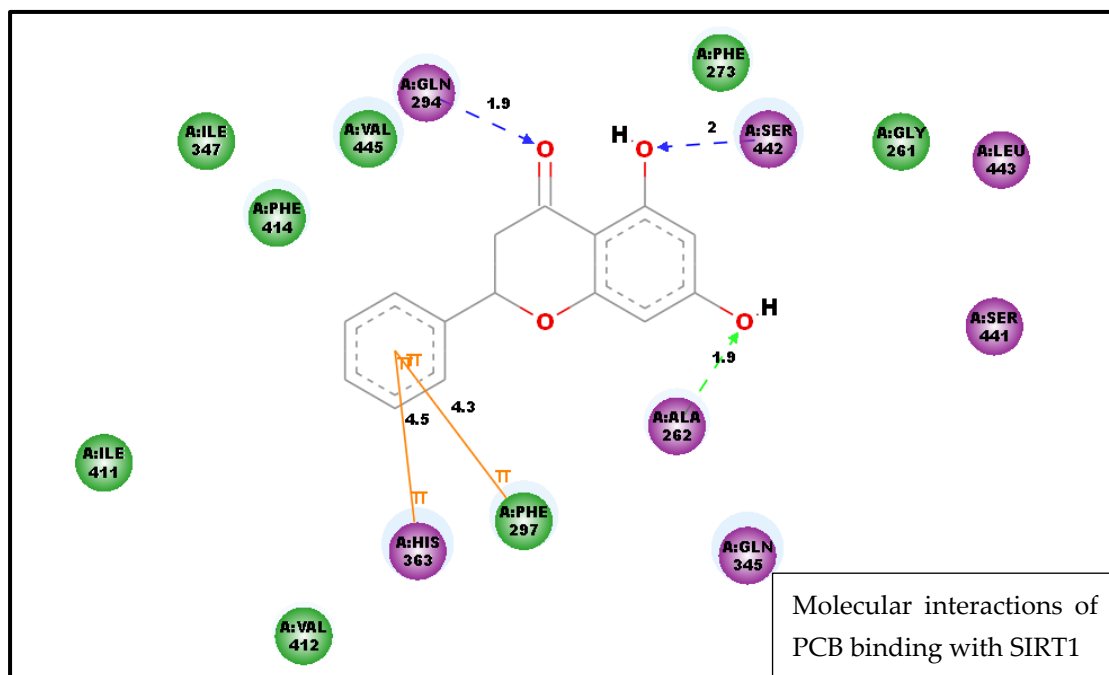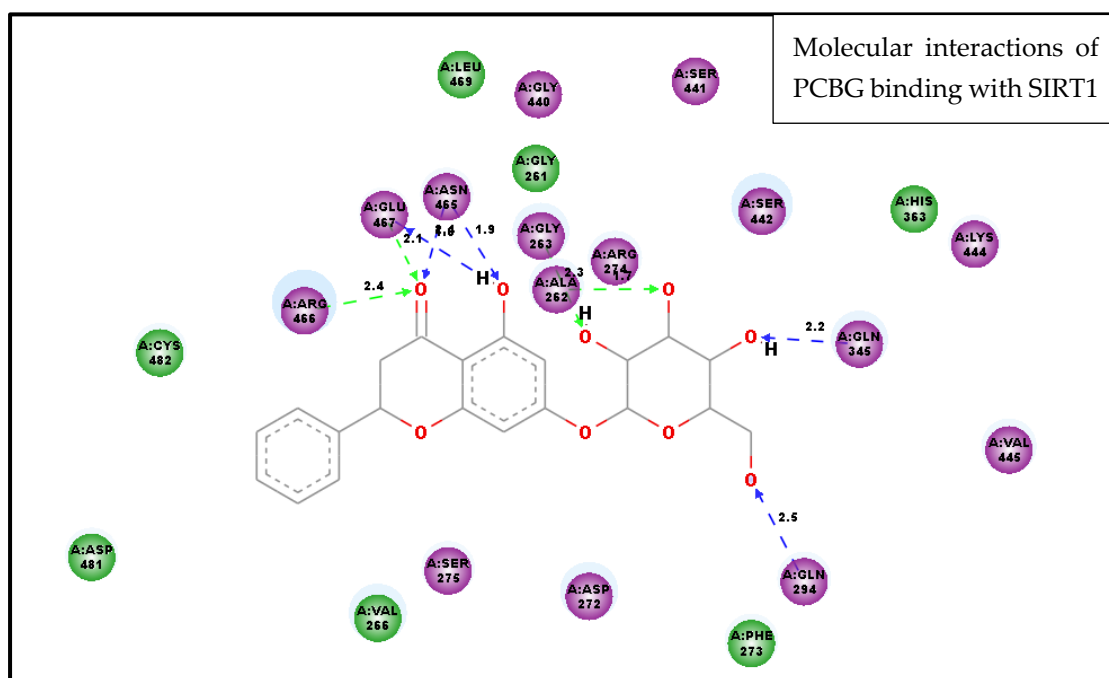



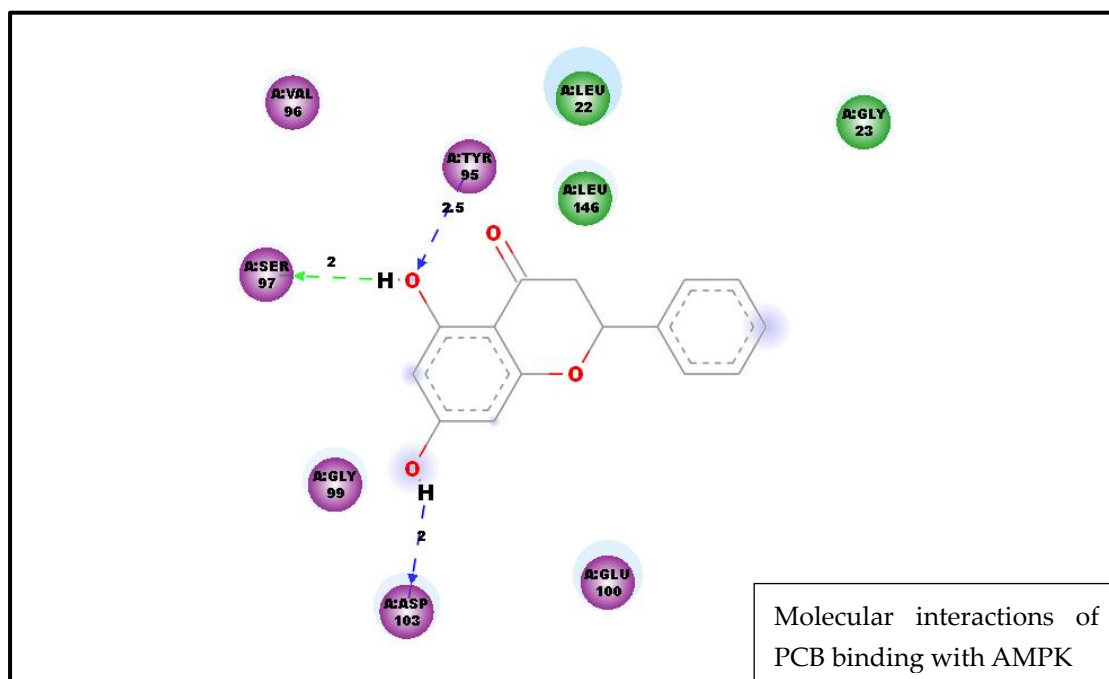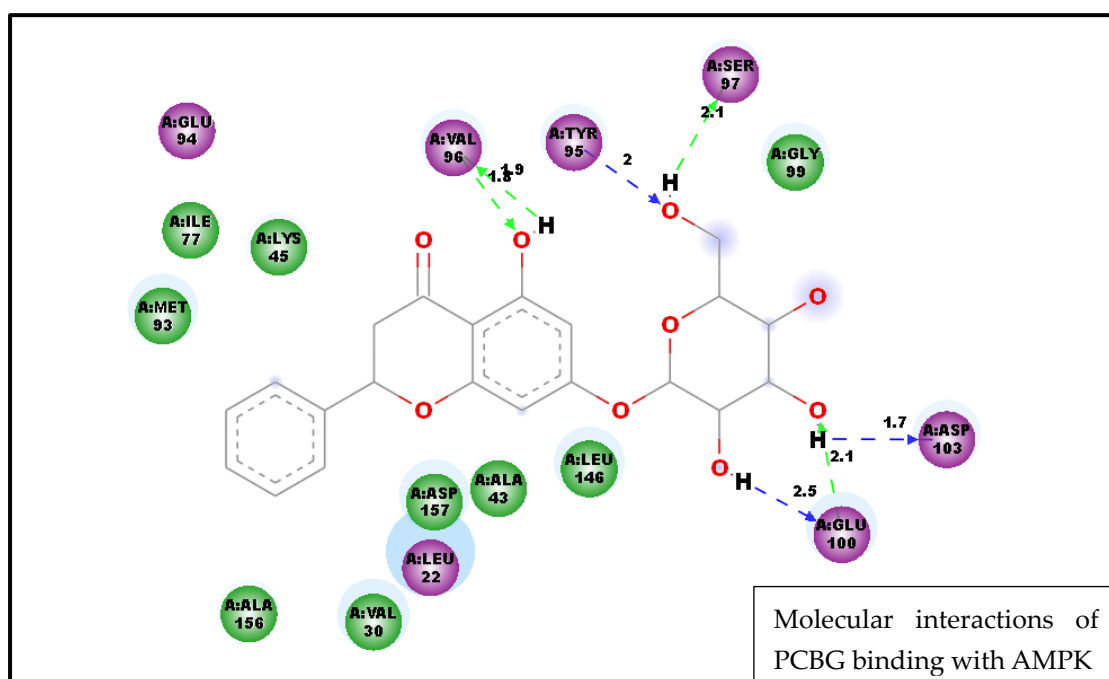

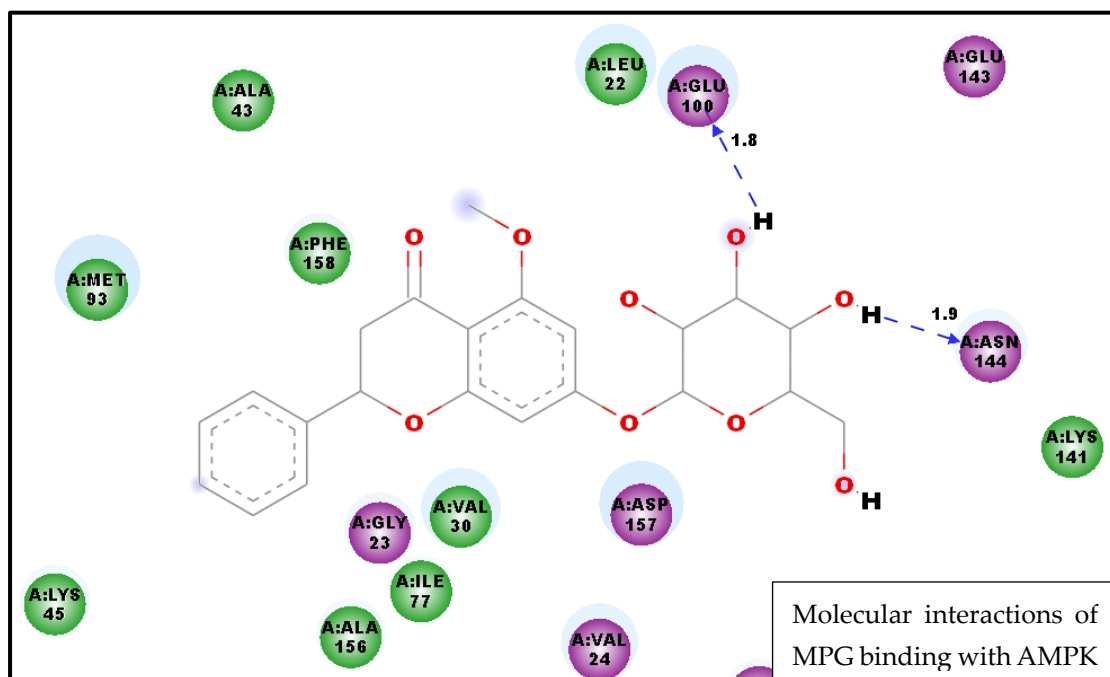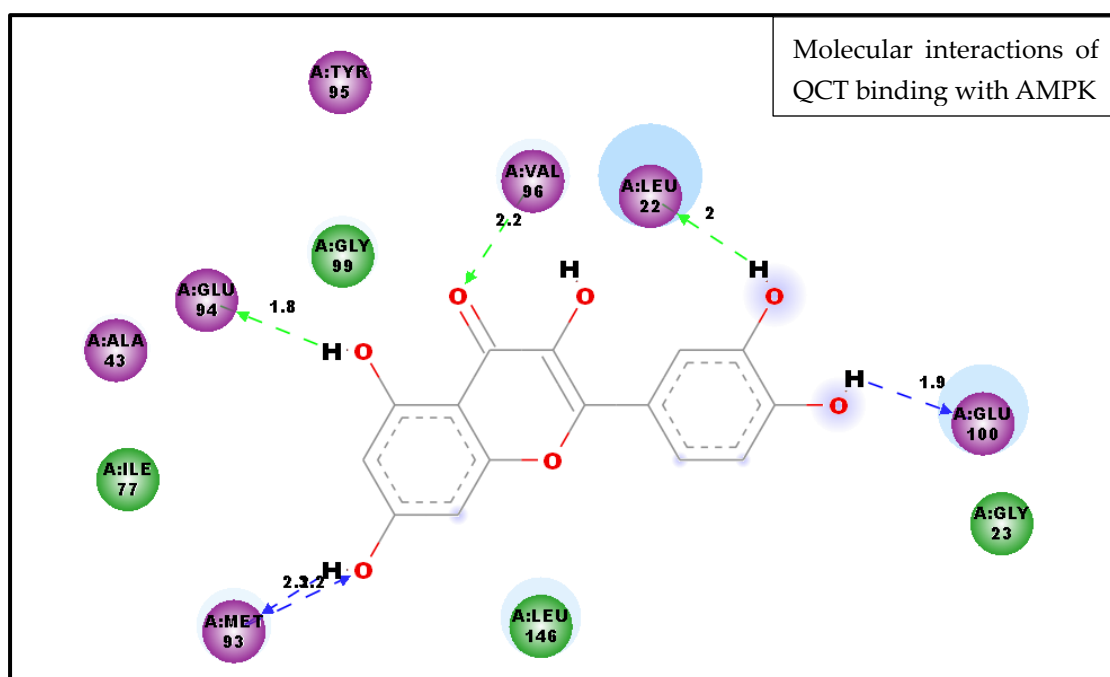

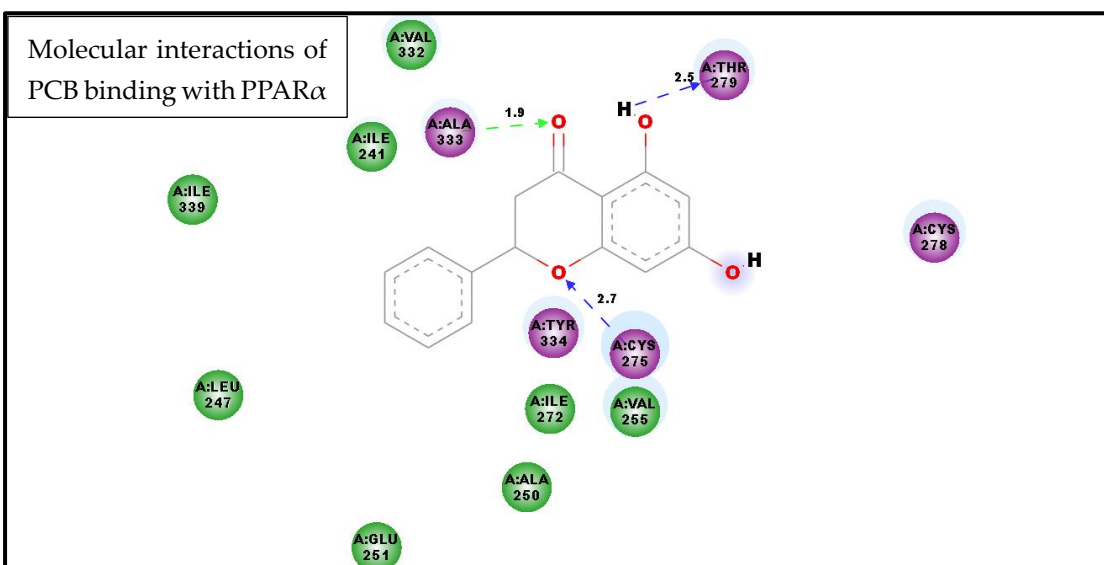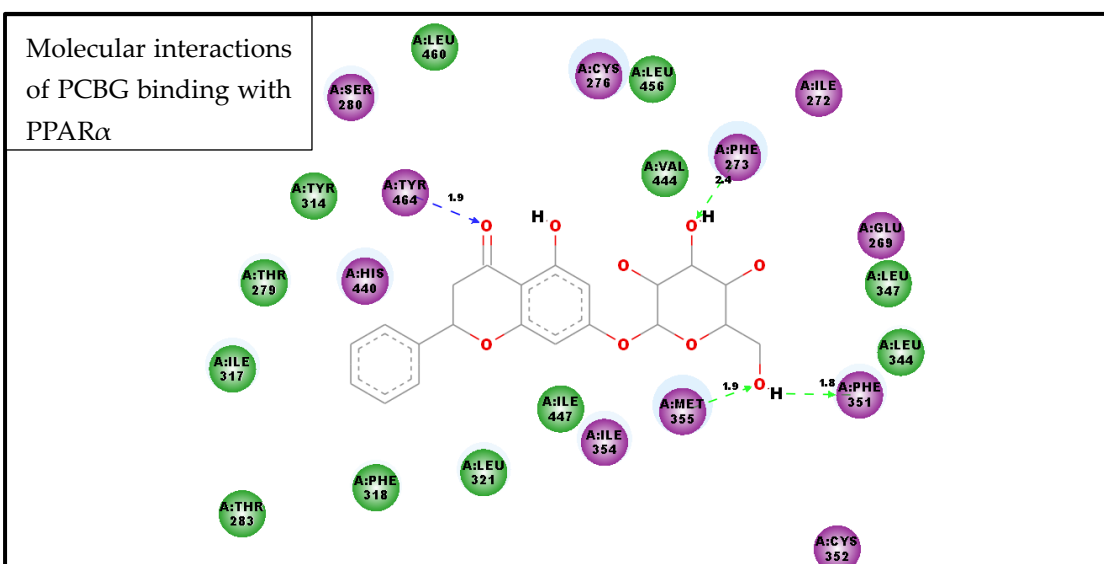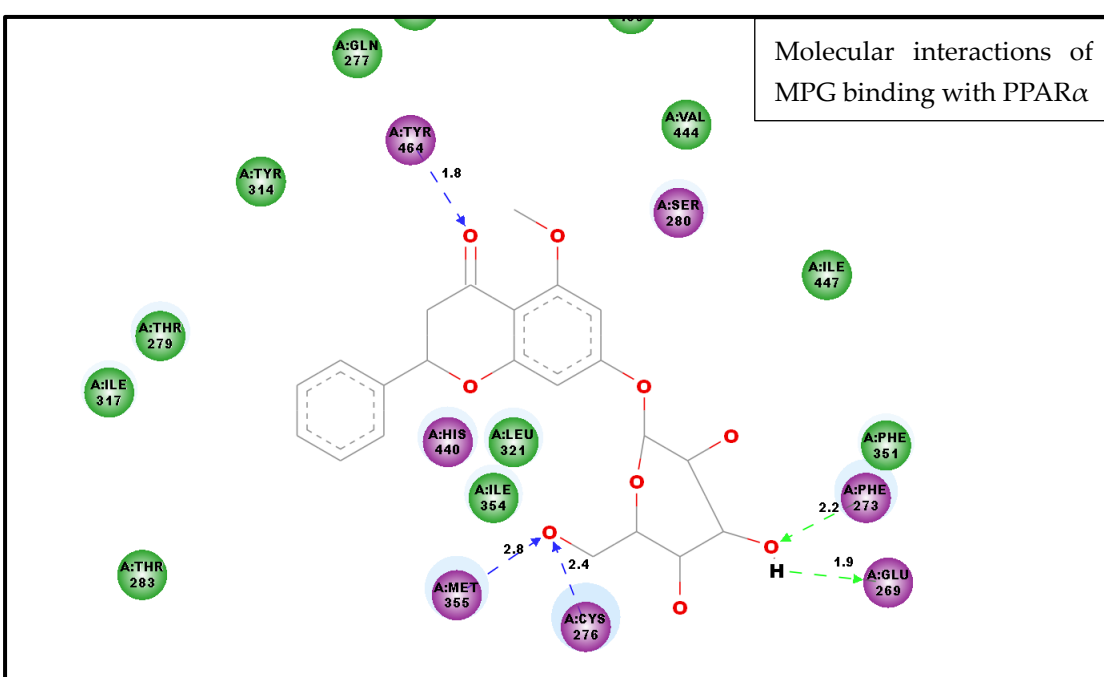

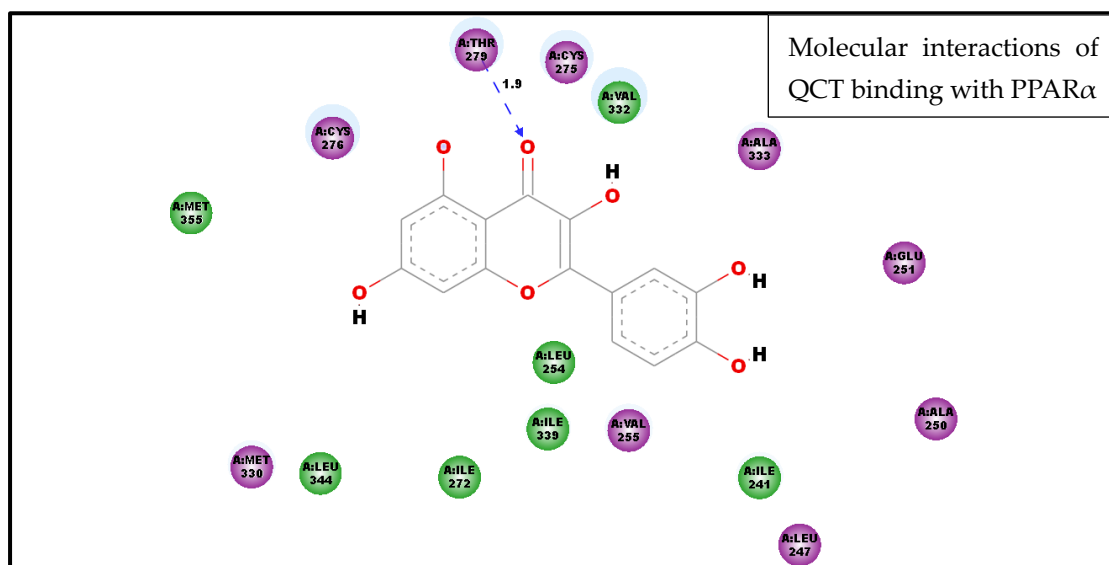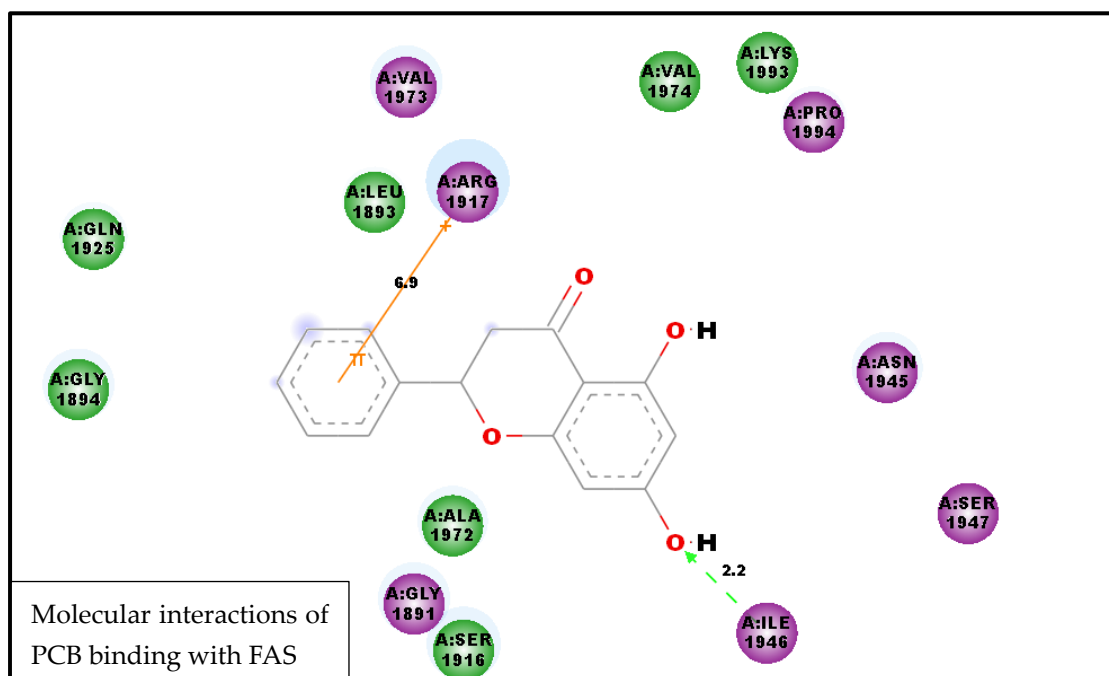

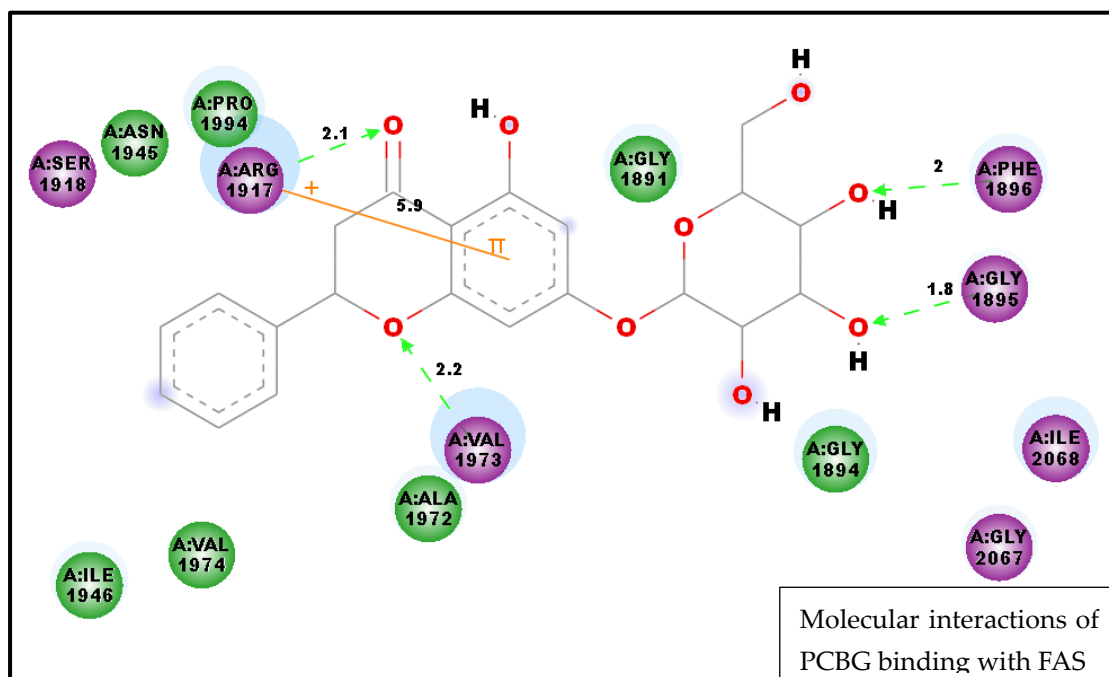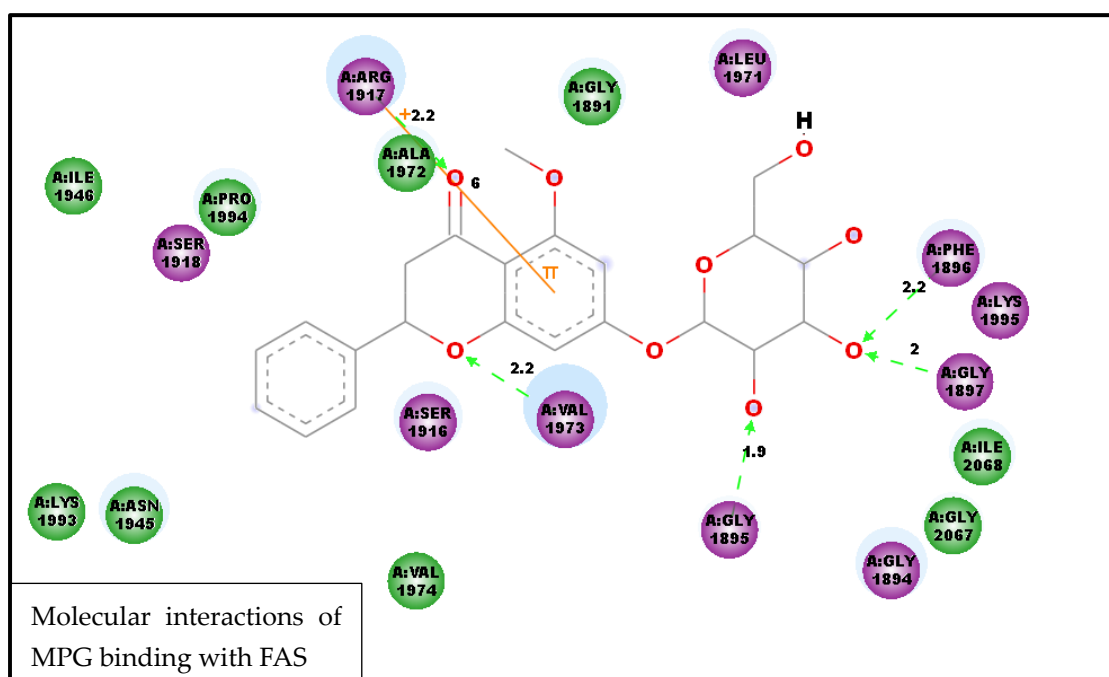

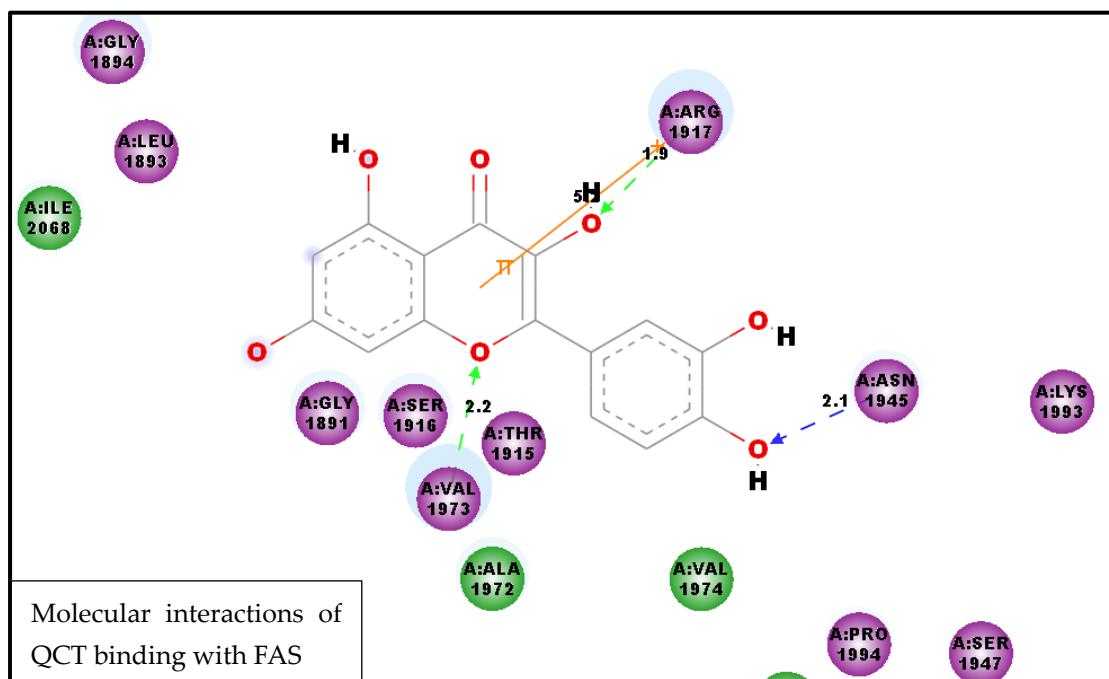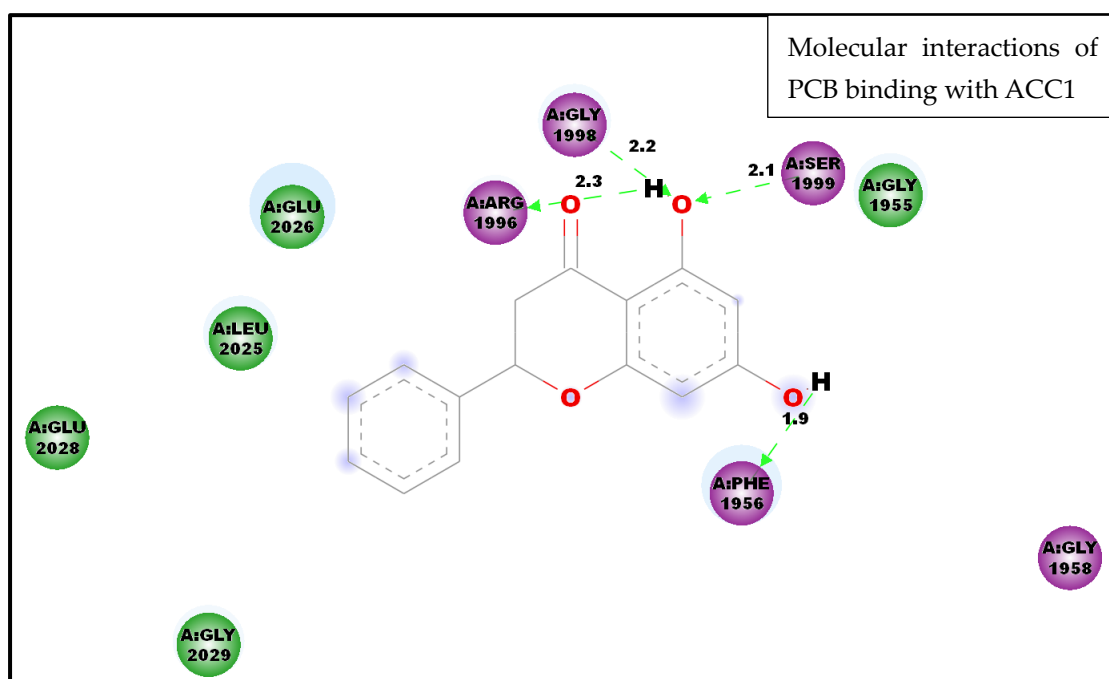

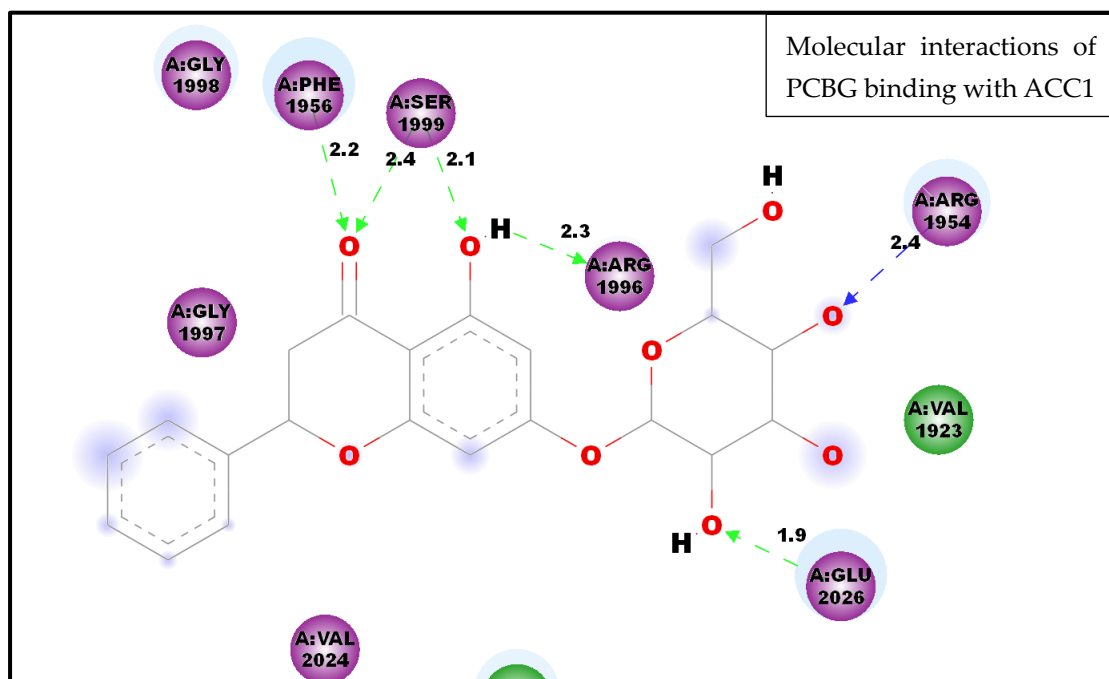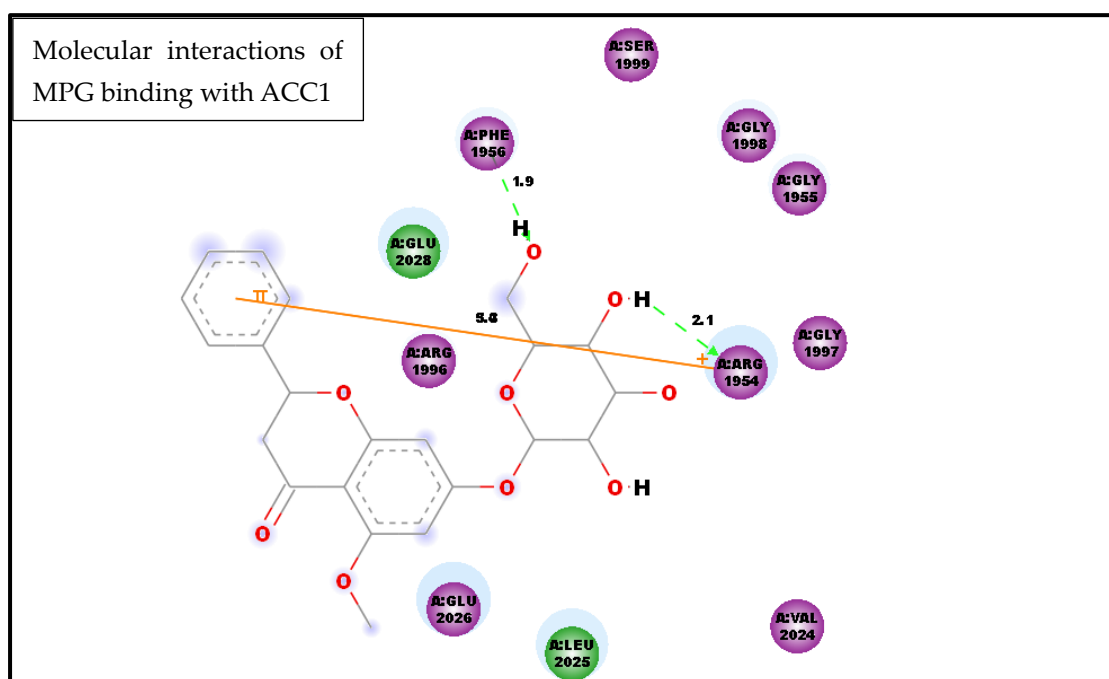

Molecular interactions of  
QCT binding with ACC1

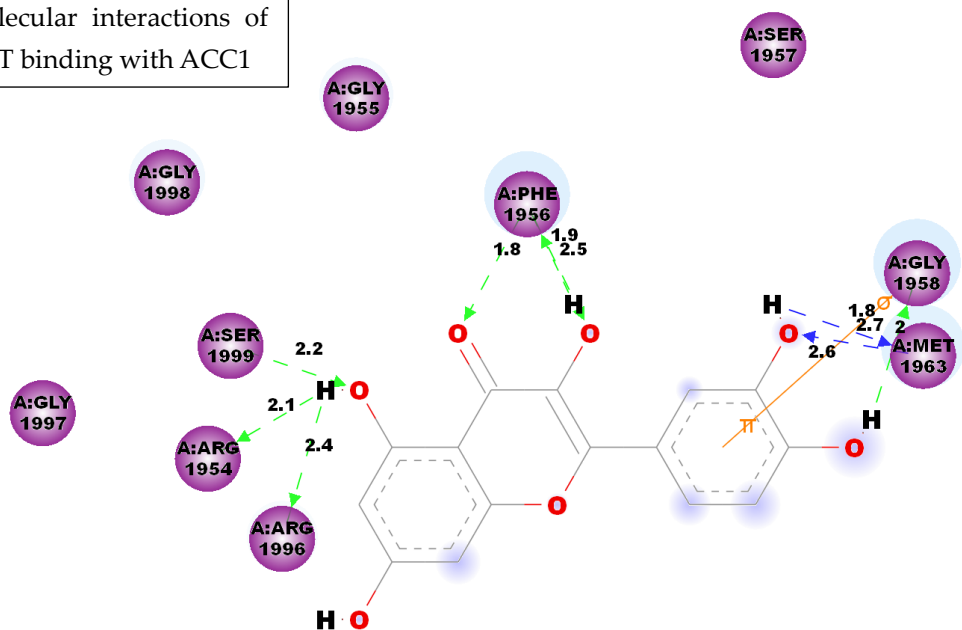

Molecular interactions of  
PCB binding with SCD1

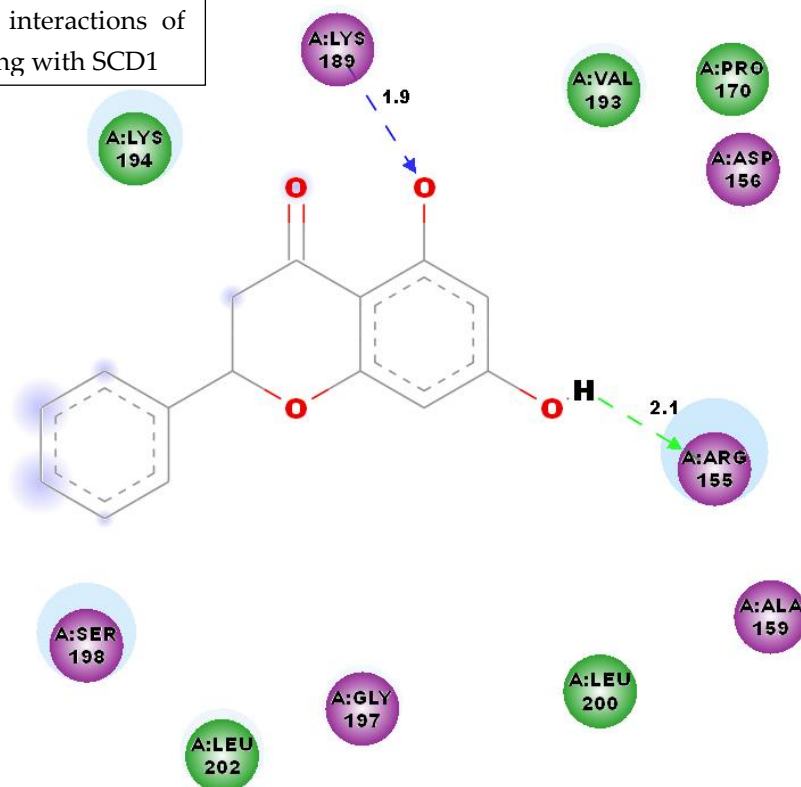

Molecular interactions of  
PCBG binding with SCD1

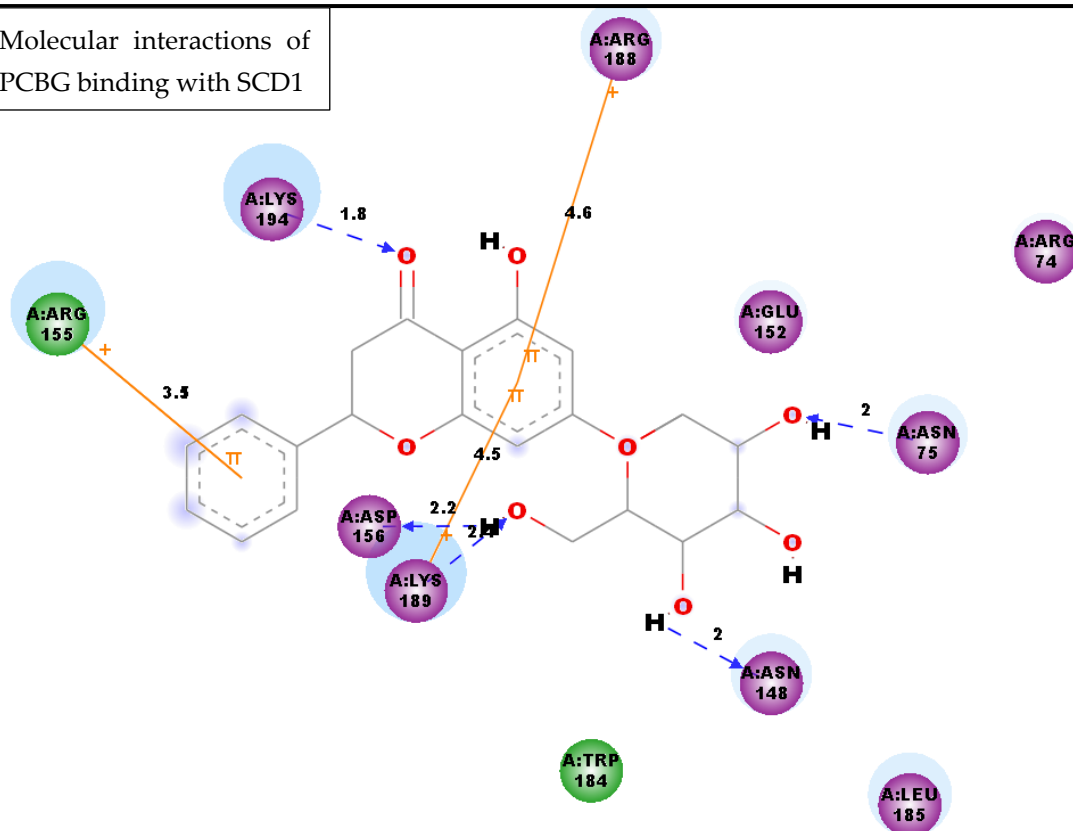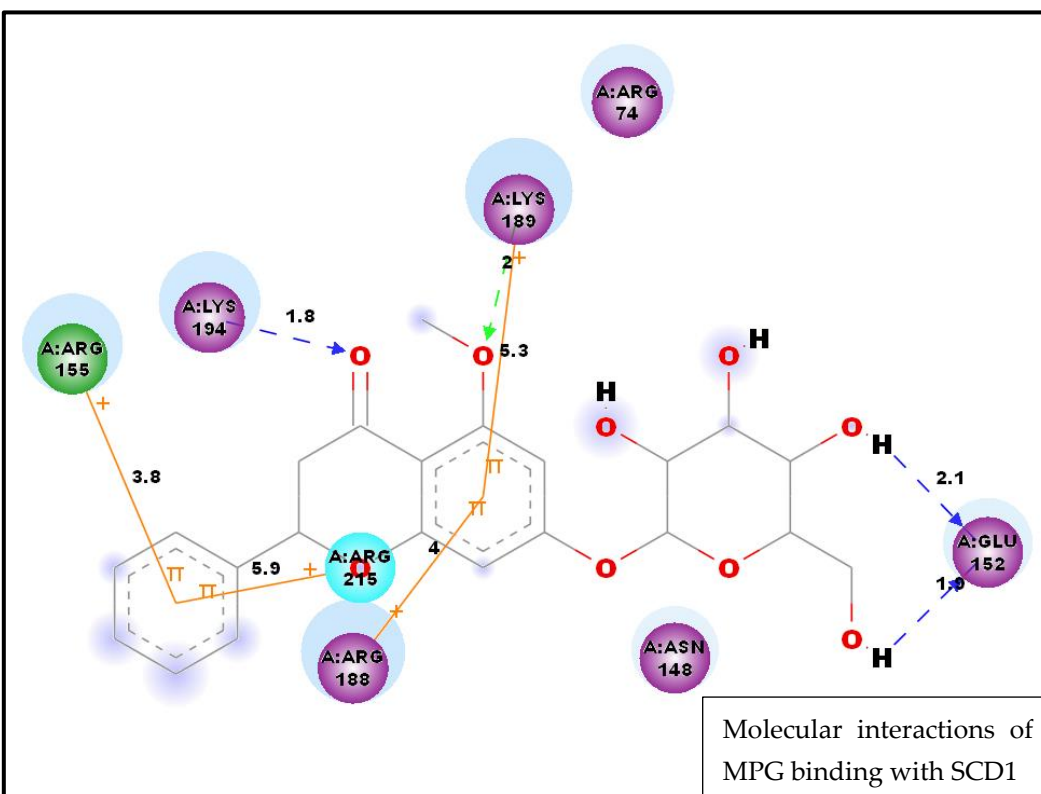

Molecular interactions of  
MPG binding with SCD1

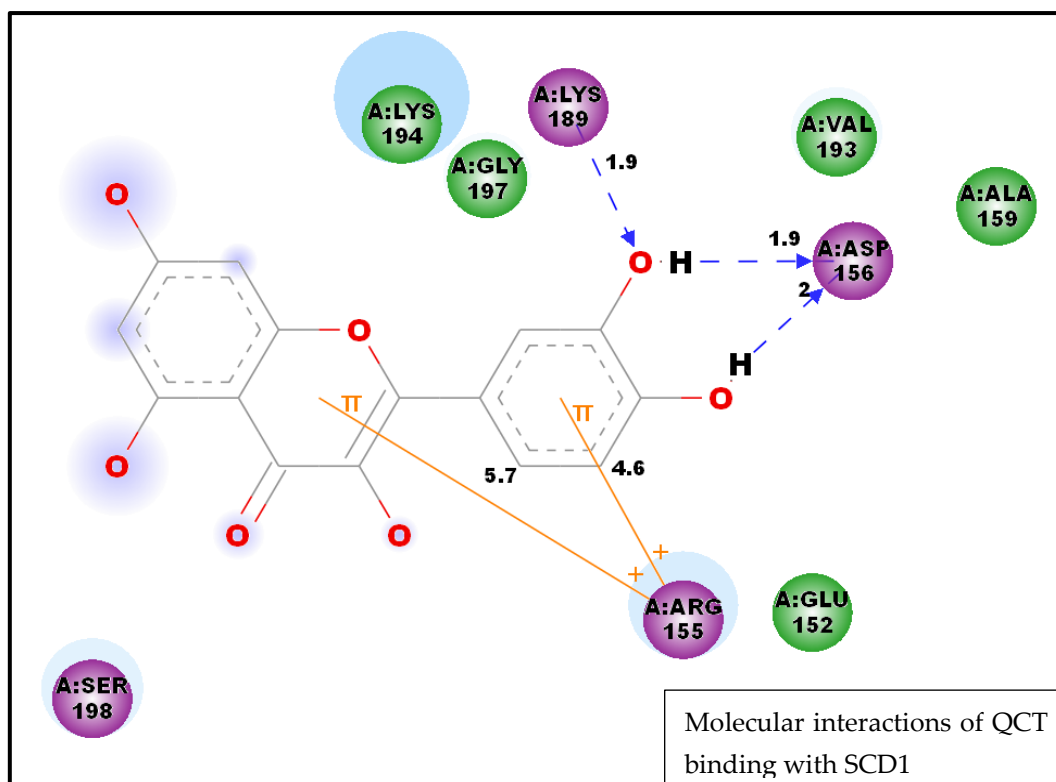

**Figure S1.** Molecular interactions of PCB, PCBG, MPG, and QCT binding with SIRT1, AMPK, PPAR $\alpha$ , FAS, ACC1 and SCD1.
